# Supplementary material
Source: Springer Nature journal article supplement (https://www.springermedizin.de/resource/supplementary/13054_2010_8405_MOESM2_ESM.pdf/9731890)

### NSE < 20µg/l

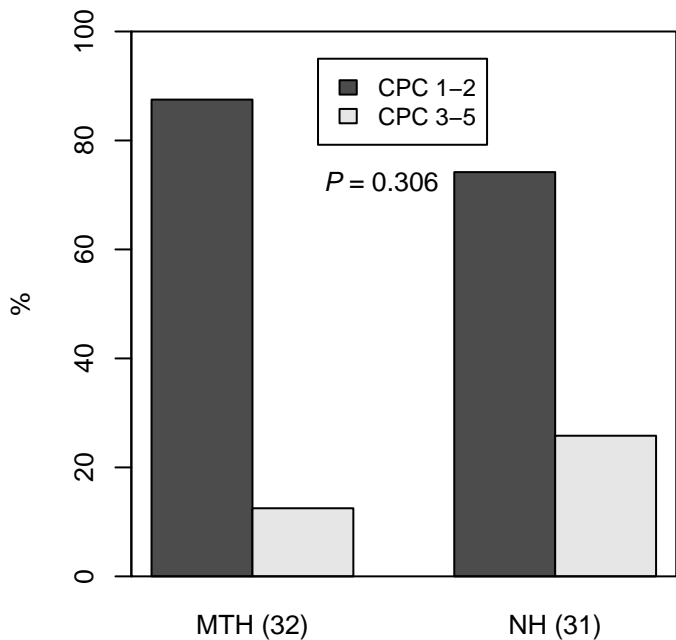

### 20 <= NSE < 40µg/l

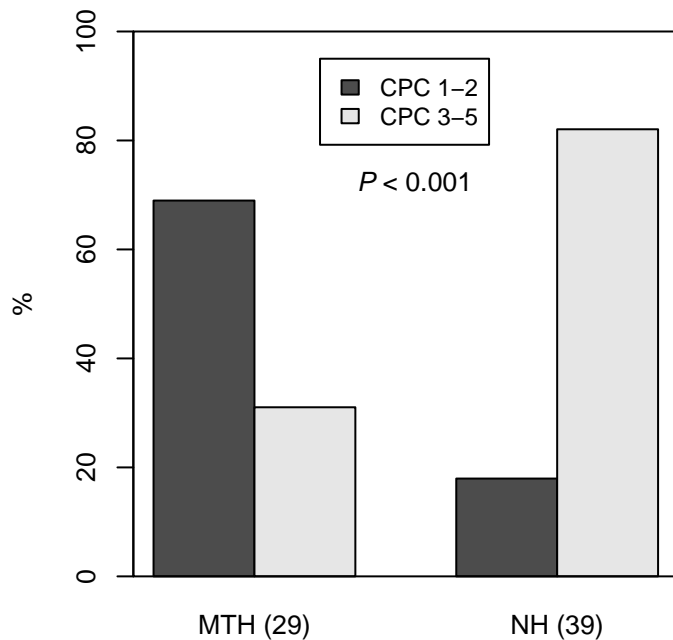

### 40 <= NSE < 80µg/l

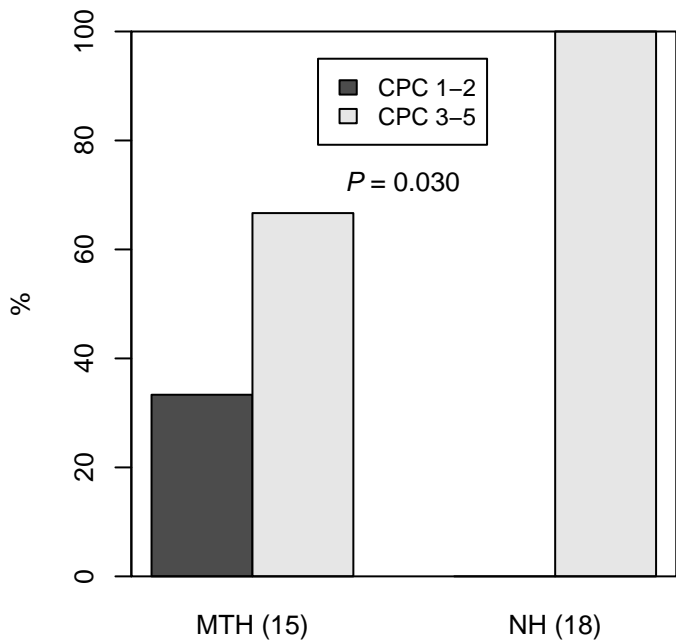

### NSE > 80µg/l

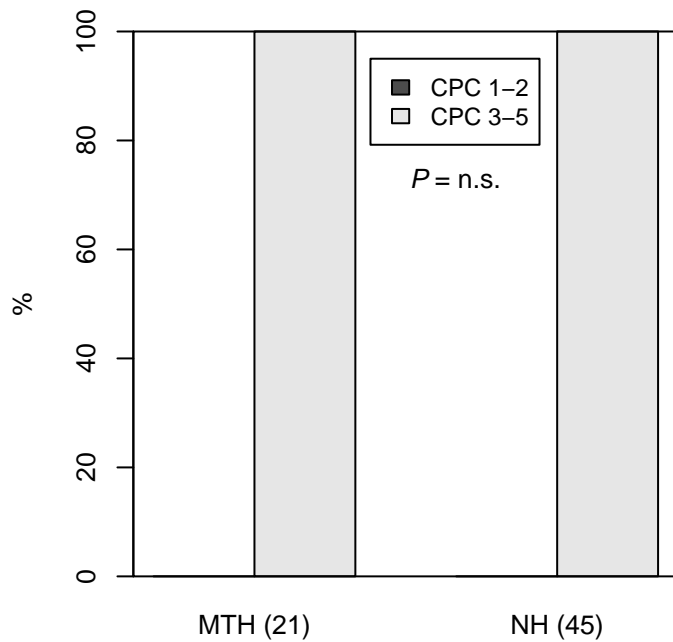

Supplement: MOESM2 [file 9731890]
